# Supplementary material for: Vital Pulp Therapy in Permanent Mature Posterior Teeth with Symptomatic Irreversible Pulpitis: A Systematic Review of Treatment Outcomes
Source: MDPI journal article supplement (doi:10.3390/medicina57060573), 2021-06-03
Supplement: s1 [file s1]

Table S1. Articles excluded after title and abstract screening using PubMed/Medline Database.

| Articles                                                                                                                                                                                       | Cause of exclusion                           |
|------------------------------------------------------------------------------------------------------------------------------------------------------------------------------------------------|----------------------------------------------|
| Eren <i>et al.</i> 2018<br>Kérourédan <i>et al.</i> 2017<br>Brignardello-Petersen 2017<br>Bane <i>et al.</i> 2016<br>Asgary & Eghbal 2010<br>Nyerere <i>et al.</i> 2006                        | Only clinical outcome available              |
| Asgary & Ramazani 2018<br>Asgary <i>et al.</i> 2017<br>Ashraf <i>et al.</i> 2017<br>Soni 2016<br>Asgary <i>et al.</i> 2016<br>Asgary & Kemal 2015<br>Solomon <i>et al.</i> 2015<br>Asgary 2011 | Case report                                  |
| Wang <i>et al.</i> , 2020<br>Sabbagh <i>et al.</i> 2016<br>Harandi <i>et al.</i> 2013                                                                                                          | Case report<br>Immature permanent teeth      |
| Peng <i>et al.</i> 2015                                                                                                                                                                        | Chinese language<br>Immature permanent teeth |
| Chen <i>et al.</i> 2020<br>Ghaderi <i>et al.</i> 2020<br>Memarpour <i>et al.</i> 2016<br>Parisay <i>et al.</i> 2015<br>Whaterhouse <i>et al.</i> 2002                                          | Primary teeth                                |
| Mousavi <i>et al.</i> 2016<br>Mente <i>et al.</i> 2016<br>Chueh & Chiang 2010<br>Eghbal <i>et al.</i> 2009<br>Sharma <i>et al.</i> 2020                                                        | Histologic and biological study              |
| Jalali <i>et al.</i> 2015<br>Dunlop <i>et al.</i> 2013<br>Elsharraww & Elbaghdady 2007<br>Bagheri <i>et al.</i> 2019                                                                           | Unrelated to the topic                       |
| Simon <i>et al.</i> 2013<br>Tan <i>et al.</i> 2020                                                                                                                                             | No symptoms of irreversible pulpitis         |
| Orhan <i>et al.</i> 2010                                                                                                                                                                       | Indirect pulp therapy                        |
| Asgary & Eghbal 2010                                                                                                                                                                           | Retracted article                            |
| Yazdani <i>et al.</i> 2014                                                                                                                                                                     | Health technology assessment                 |
| Asgary & Ehsani 2009                                                                                                                                                                           | Case series                                  |
| Zafar <i>et al.</i> 2020<br>Sadaf 2020                                                                                                                                                         | Systematic review/review                     |
| George 2020<br>Bakhurji 2020                                                                                                                                                                   | Opinion article                              |

|                                |                     |
|--------------------------------|---------------------|
| Gemmell <i>et al.</i> 2020     | Survey              |
| Linsuwanont <i>et al.</i> 2017 | Retrospective study |

Table S2. Articles excluded using the EMBASE database.

| Articles                                                                             | Cause of exclusion                                     |
|--------------------------------------------------------------------------------------|--------------------------------------------------------|
| Zanini <i>et al.</i> 2017<br>Rechenberg <i>et al.</i> 2016<br>Lin <i>et al.</i> 2020 | Inflammatory mediators and histological studies        |
| Yu <i>et al.</i> 2020<br>Chompu-Inwai <i>et al.</i> 2018                             | Unrelated to the topic                                 |
| Chen <i>et al.</i> 2020                                                              | Primary molars                                         |
| Sabeti <i>et al.</i> 2021                                                            | Animal model                                           |
| Wang 2020<br>Ramezani <i>et al.</i> 2020                                             | Case Report and immature tooth                         |
| Kusumvalli <i>et al.</i> 2019                                                        | Absence of signs and symptoms of irreversible pulpitis |

Table S3. Articles excluded using the Cochrane database.

| ARTICLES OR MAIN ID OF CLINICAL TRIALS                                                                                                                                                                                                                                                                                       | CAUSES OF EXCLUSION                             |
|------------------------------------------------------------------------------------------------------------------------------------------------------------------------------------------------------------------------------------------------------------------------------------------------------------------------------|-------------------------------------------------|
| NCT03956199<br>NCT00748280<br>NCT04573374<br>NCT04397315<br>NCT04308863<br>NCT03186690<br>NCT04243733<br>NCT03916900<br>IRCT20151226025695N3<br>NCT03735069                                                                                                                                                                  | Clinical trials without results reported        |
| RCT2013030512708N1<br>NCT03168620<br>NCT04599244<br>Jalali <i>et al.</i> 2015<br>Bane <i>et al.</i> 2016<br>Kérourédan <i>et al.</i> 2017<br>Elsharrawy & Elbaghdady 2007<br>IRCT201110137790N1<br>IRCT20181021041405N1<br>IRCT2017101036699N1<br>CTRI/2019/09/021443<br>CTRI/2019/09/021443<br>RBR.5j25nm<br>ISRCTN14290358 | Clinical trials/articles unrelated to the topic |
| Eren <i>et al.</i> 2018<br>ISRCTN14290358<br>Asgary & Eghbal 2010                                                                                                                                                                                                                                                            | Clinical outcome/pain relief                    |
| McDougal 2004                                                                                                                                                                                                                                                                                                                | Intermediate restoration                        |
| Asgary & Eghbal 2010                                                                                                                                                                                                                                                                                                         | Retracted                                       |

|                                                                                                                                                                                                                                       |                                                                                        |
|---------------------------------------------------------------------------------------------------------------------------------------------------------------------------------------------------------------------------------------|----------------------------------------------------------------------------------------|
| NCT04719247<br>Chen et al, 2020<br>TCTR20151017001<br>TCTR20181115015<br>ChiCTR20000032462<br>Waterhouse <i>et al.</i> 2002<br>CTRI/2019/12/022559<br>CTRI/2020/05/025148<br>PACTR201812884054327<br>IRCT138902203893N2<br>RBR-9chxvg | Primary teeth                                                                          |
| Orhan <i>et al.</i> 2010                                                                                                                                                                                                              | Absence of signs and symptoms of irreversible pulpitis                                 |
| PACTR202001824413147                                                                                                                                                                                                                  | Access not available/pulp capping material was not a hydraulic calcium silicate cement |
| E Bakjuri, 2020                                                                                                                                                                                                                       | Abstract not available                                                                 |
| ISRCTN84455971<br>ISRCTN84455971<br>TCTR20180612004<br>CTRI/2020/09/028105<br>CTRI/2020/03/023766<br>CTRI/2019/05/019132<br>CTRI/2020/03/023894<br>CTRI/2020/10/028640<br>CTRI/2018/06/014426                                         | Clinical trials without published results and abstract was not available               |
| Alawwad <i>et al.</i> , 2020                                                                                                                                                                                                          | Immature permanent teeth                                                               |

Table S4. Articles excluded after full text reading.

| Author(s)                            | Title                                                           | Cause of exclusion                                                                             |
|--------------------------------------|-----------------------------------------------------------------|------------------------------------------------------------------------------------------------|
| Asgary <i>et al.</i><br>2018<br>[38] | "Treatment Outcomes of 4 Vital Pulp Therapies in Mature Molars" | The outcome was unclear. Specific outcome for teeth with irreversible pulpitis not discernible |

|                                      |                                                                                                                                                                                      |                                                                                                                                                                                                                |
|--------------------------------------|--------------------------------------------------------------------------------------------------------------------------------------------------------------------------------------|----------------------------------------------------------------------------------------------------------------------------------------------------------------------------------------------------------------|
|                                      |                                                                                                                                                                                      | from reversible pulpitis. Attempts to contact the authors were not successful.                                                                                                                                 |
| Taha <i>et al.</i><br>2017<br>[40]   | "Assessment of Mineral Trioxide Aggregate Pulpotomy in mature permanent teeth with carious exposures"                                                                                | The outcome was unclear. Specific outcome for teeth with irreversible pulpitis not discernible from reversible pulpitis. Authors were not available to provide additional clarification of the published data. |
| Galani <i>et al.</i><br>2017<br>[43] | "Comparative Evaluation of Postoperative Pain and Success Rate after Pulpotomy and Root Canal Treatment in cariously Exposed Mature Permanent Molars: A Randomized Controlled Trial" | Diagnosis of pulpitis was not consistent with inclusions criteria                                                                                                                                              |

Table S5. Risk-of-bias in randomized controlled trials based on the Cochrane Collaboration RoB 2 tool.

|                                           | Asgary <i>et al.</i><br>2013 [2] | Asgary <i>et al.</i><br>2014 [3] | Asgary <i>et al.</i><br>2015 [4] | Asgary &<br>Eghbal 2013<br>[5] | Asgary <i>et al.</i><br>2017 [6] | Kumar <i>et al.</i><br>2016 [34] | Taha &<br>Khazali 2017<br>[7] | Uesrichai <i>et al.</i><br>2019 [8] | Koli <i>et al.</i><br>2021 [41] |
|-------------------------------------------|----------------------------------|----------------------------------|----------------------------------|--------------------------------|----------------------------------|----------------------------------|-------------------------------|-------------------------------------|---------------------------------|
| 1.Random sequence generation              | LOW                              | LOW                              | LOW                              | UNCERTAIN                      | UNCERTAIN                        | LOW                              | LOW                           | LOW                                 | LOW                             |
| 2.Allocation concealment                  | LOW                              | LOW                              | LOW                              | LOW                            | LOW                              | LOW                              | LOW                           | LOW                                 | LOW                             |
| 3. Blinding of participants and personnel | UNCERTAIN                        | UNCERTAIN                        | UNCERTAIN                        | LOW                            | LOW                              | UNCERTAIN                        | LOW                           | LOW                                 | UNCERTAIN                       |
| 4. Blinding of outcome assessment         | LOW                              | LOW                              | LOW                              | LOW                            | LOW                              | LOW                              | LOW                           | LOW                                 | LOW                             |
| 5.Incomplete outcome data                 | UNCERTAIN                        | UNCERTAIN                        | UNCERTAIN                        | UNCERTAIN                      | UNCERTAIN                        | UNCERTAIN                        | LOW                           | LOW                                 | LOW                             |
| 6.Selective reporting                     | LOW                              | LOW                              | LOW                              | LOW                            | LOW                              | LOW                              | LOW                           | LOW                                 | LOW                             |
| 7.Other sources of bias                   |                                  |                                  |                                  |                                |                                  |                                  |                               |                                     |                                 |
| 7.1. Group imbalance                      | LOW                              | LOW                              | LOW                              | LOW                            | LOW                              | LOW                              | LOW                           | LOW                                 | LOW                             |
| 7.2. Sample size                          | LOW                              | LOW                              | LOW                              | LOW                            | LOW                              | LOW                              | UNCERTAIN                     | LOW                                 | UNCERTAIN                       |
| 7.3. Clinician bias                       | LOW                              | LOW                              | LOW                              | LOW                            | LOW                              | HIGH                             | LOW                           | LOW                                 | LOW                             |
| 8. Final risk of bias                     | FAIR                             | FAIR                             | FAIR                             | FAIR                           | FAIR                             | HIGH                             | FAIR                          | LOW                                 | FAIR                            |

Table S6. Risk of bias assessment justification for randomized clinical trials.

| Author(s), year               | The risk of bias justification                                                                                                                                                                                                                                                                |
|-------------------------------|-----------------------------------------------------------------------------------------------------------------------------------------------------------------------------------------------------------------------------------------------------------------------------------------------|
|                               | <b>Blinding of participants and personnel- UNCERTAIN</b> <ul style="list-style-type: none"> <li>Different protocols for each treatment</li> </ul>                                                                                                                                             |
| Asgary <i>et al.</i> 2013 [2] | <b>Incomplete outcome data- UNCERTAIN</b> <ul style="list-style-type: none"> <li>Number of teeth excluded after intraoperative assessment of pulp necrosis or hemostasis not achieved is not presented</li> </ul>                                                                             |
|                               | <b>Blinding of participants and personnel- UNCERTAIN</b> <ul style="list-style-type: none"> <li>Different protocols for each treatment</li> </ul>                                                                                                                                             |
| Asgary <i>et al.</i> 2014 [3] | <b>Incomplete outcome data- UNCERTAIN</b> <ul style="list-style-type: none"> <li>Number of teeth excluded after intraoperative assessment of pulp necrosis or hemostasis not achieved is not presented</li> </ul>                                                                             |
|                               | <b>Blinding of participants and personnel- UNCERTAIN</b> <ul style="list-style-type: none"> <li>Different protocols for each treatment</li> </ul>                                                                                                                                             |
| Asgary <i>et al.</i> 2015 [4] | <b>Incomplete outcome data- UNCERTAIN</b> <ul style="list-style-type: none"> <li>Number of teeth excluded after intraoperative assessment of pulp necrosis or hemostasis not achieved is not presented</li> <li>Loss to follow-up greater than 20%</li> </ul>                                 |
|                               | <b>Random sequence generation- UNCERTAIN</b> <ul style="list-style-type: none"> <li>Information is missing</li> </ul>                                                                                                                                                                         |
| Asgary & Egbhal 2013 [5]      | <b>Incomplete outcome data- UNCERTAIN</b> <ul style="list-style-type: none"> <li>Number of teeth excluded after intraoperative assessment of pulp necrosis or hemostasis not achieved is not presented the authors to clarify this point were not successful</li> </ul>                       |
|                               | <b>Random sequence generation- UNCERTAIN</b> <ul style="list-style-type: none"> <li>Information not provided</li> </ul>                                                                                                                                                                       |
| Asgary <i>et al.</i> 2017 [6] | <b>Incomplete outcome data- UNCERTAIN</b> <p>Number of teeth excluded after intraoperative assessment of pulp necrosis or hemostasis not achieved is not presented the authors to clarify this point were not successful</p>                                                                  |
|                               | <b>Blinding of participants and personnel- UNCERTAIN</b> <ul style="list-style-type: none"> <li>Flow of the treatment protocol described was not in agreement with randomization presented in the manuscript (PRF preparation started before the beginning of pulpotomy treatment)</li> </ul> |
| Kumar <i>et al.</i> 2016 [34] | <b>Incomplete outcome data- UNCERTAIN</b> <ul style="list-style-type: none"> <li>Loss to follow-up greater than 20%</li> </ul> <b>Clinician bias- HIGH</b> <ul style="list-style-type: none"> <li>Non-calibration or blinding of radiographic evaluators</li> </ul>                           |
|                               | <b>Sample Size- UNCERTAIN</b> <ul style="list-style-type: none"> <li>No statistical calculation was presented to establish the sample size.</li> </ul>                                                                                                                                        |
| Taha & Khazali 2017 [7]       |                                                                                                                                                                                                                                                                                               |



---

|                             |                                                                                                                                |
|-----------------------------|--------------------------------------------------------------------------------------------------------------------------------|
| Koli <i>et al</i> 2021 [41] | <b>Blinding of participants and personnel-</b> UNCERTAIN                                                                       |
|                             | <ul style="list-style-type: none"> <li>Tested materials and techniques are quite different and not possible to mask</li> </ul> |
|                             | <b>Sample Size-</b> UNCERTAIN                                                                                                  |
|                             | <ul style="list-style-type: none"> <li>No statistical calculation was presented to establish the sample size.</li> </ul>       |

---

Table S7. Risk-of-bias in prospective cohort studies based on Cochrane Collaboration ROBINS-I tool.

|                                                       | Qudeimat <i>et al.</i><br>2017<br>[35] | Taha &<br>Abdulkhader 2018<br>[36] | Taha &<br>Abdelkhader 2018<br>[37] |
|-------------------------------------------------------|----------------------------------------|------------------------------------|------------------------------------|
| 1. Bias due to confounding                            | LOW                                    | LOW                                | LOW                                |
| 2. Bias in selection of participants into the study   | SERIOUS*                               | LOW                                | LOW                                |
| 3. Bias in classification of interventions            | LOW                                    | LOW                                | LOW                                |
| 4. Bias due to deviations from intended interventions | LOW                                    | LOW                                | LOW                                |
| 5. Bias due to missing data                           | SERIOUS**                              | LOW                                | LOW                                |
| 6. Bias in measurement of outcomes                    | LOW                                    | LOW                                | LOW                                |
| 7. Bias in selection of the reported result           | LOW                                    | LOW                                | LOW                                |
| Overall bias                                          | SERIOUS                                | LOW                                | LOW                                |

\* Diagnosis included (i) intermittent or spontaneous, sharp or dull, localized, diffuse, or referred pain; (ii) rapid exposure to dramatic temperature changes elicited heightened and prolonged episodes of pain even after the thermal stimulus has been removed; and (iii) no clinical symptoms but pulpal bleeding produced by caries excavation.

\*\* A specific end-point of the follow-up is not presented.

Table S8. Risk-of-bias in prospective cohort studies based on the Newcastle-Ottawa Scale.

|                      |                                                                                 | Qudeimat <i>et al.</i> 2017 [35] | Taha & Abdulkhader 2018 [36] | Taha & Abdelkhader 2018 [37] |
|----------------------|---------------------------------------------------------------------------------|----------------------------------|------------------------------|------------------------------|
| <b>Selection</b>     | 1. Representativeness of the exposed cohort                                     | _ a                              | _ a                          | ★                            |
|                      | 2. Selection of the non-exposed cohort                                          | _ b                              | _ b                          | _ b                          |
|                      | 3. Ascertainment of exposure                                                    | ★                                | ★                            | ★                            |
|                      | 4. Demonstration that outcome of interest was not present at start of the study | ★                                | ★                            | ★                            |
| <b>Comparability</b> |                                                                                 | _ b                              | _ b                          | _ b                          |
| <b>Outcome</b>       | 1. Assessment of outcome                                                        | ★                                | ★                            | ★                            |
|                      | 2. Was follow-up long enough for outcomes to occur                              | _ c                              | ★                            | ★                            |
|                      | 3. Adequacy of follow up of cohorts                                             | ★                                | ★                            | ★                            |
| <b>Overall merit</b> |                                                                                 | 4                                | 5                            | 6                            |

- a. Age range includes only young patients (age range 10 to 17 years old).
- b. Non-exposed group inexistent.
- c. A specific follow-up time length was not presented at the beginning of the study. The patients were evaluated only once, at different time lengths.
